# Supplementary material for: Phytotoxicity and Accumulation of Copper-Based Nanoparticles in Brassica under Cadmium Stress
Source: MDPI journal article supplement (doi:10.3390/nano12091497), 2022-04-28
Supplement: s1 [file s1]

# Supplementary Materials

## Phytotoxicity and Accumulation of Copper-Based Nanoparticles in *Brassica* under Cadmium Stress

Shiqi Wang <sup>1,2,3</sup>, Yutong Fu <sup>1,2,3</sup>, Shunan Zheng <sup>4</sup>, Yingming Xu <sup>2,3</sup> and Yuebing Sun <sup>2,3,\*</sup>

<sup>1</sup> College of Resources and Environment, Northeast Agricultural University, Harbin 150030, China; wwp875822270@163.com (S.W.); 18845141255@163.com (Y.F.)

<sup>2</sup> Key Laboratory of Original Agro-Environmental Pollution Prevention and Control, Ministry of Agriculture and Rural Affairs (MARA), Agro-Environmental Protection Institute, Tianjin 300191, China; ymxu1999@126.com

<sup>3</sup> Tianjin Key Laboratory of Agro-Environment and Agro-Product Safety, Agro-Environmental Protection Institute, MARA, Tianjin 300191, China;

<sup>4</sup> Rural Energy & Environment Agency, MARA, Beijing 100125, China; zhengshunan1234@163.com

\* Correspondence: sunyuebing2008@126.com

**Table S1.** The composition and concentration of Hoagland nutrient solution

| TK  | Composition                                                                        | Concentration(mg/L)    |
|-----|------------------------------------------------------------------------------------|------------------------|
| TK1 | K <sub>2</sub> SO <sub>4</sub>                                                     | 130.7                  |
|     | KCl                                                                                | 7.5                    |
|     | KH <sub>2</sub> PO <sub>4</sub>                                                    | 34.0                   |
| TK2 | MgSO <sub>4</sub> ·H <sub>2</sub> O                                                | 160.2                  |
|     | Ca(NO <sub>3</sub> ) <sub>2</sub> ·4H <sub>2</sub> O                               | 472.3                  |
| TK3 | H <sub>3</sub> BO <sub>3</sub>                                                     | 0.6                    |
|     | CuSO <sub>4</sub> ·5H <sub>2</sub> O                                               | 2.5 × 10 <sup>-2</sup> |
| TK4 | ZnSO <sub>4</sub> ·7H <sub>2</sub> O                                               | 0.3                    |
|     | MnSO <sub>4</sub> ·H <sub>2</sub> O                                                | 0.2                    |
|     | (NH <sub>4</sub> ) <sub>6</sub> Mo <sub>7</sub> O <sub>24</sub> ·4H <sub>2</sub> O | 6.2 × 10 <sup>-3</sup> |
| TK5 | FeSO <sub>4</sub> ·7H <sub>2</sub> O                                               | 27.8                   |
|     | Na <sub>2</sub> EDTA·2H <sub>2</sub> O                                             | 37.2                   |
